# Supplementary figures and images for: Vimentin intermediate filaments modulate the motility of mitochondria
Source: PubMed Central journal article supplement — Mol Biol Cell. 2011 Jul 1;22(13):2282–9. doi: 10.1091/mbc.E10-09-0766 (PMC3128530; doi:10.1091/mbc.e10-09-0766), 2011-07-01

**Figure S1**

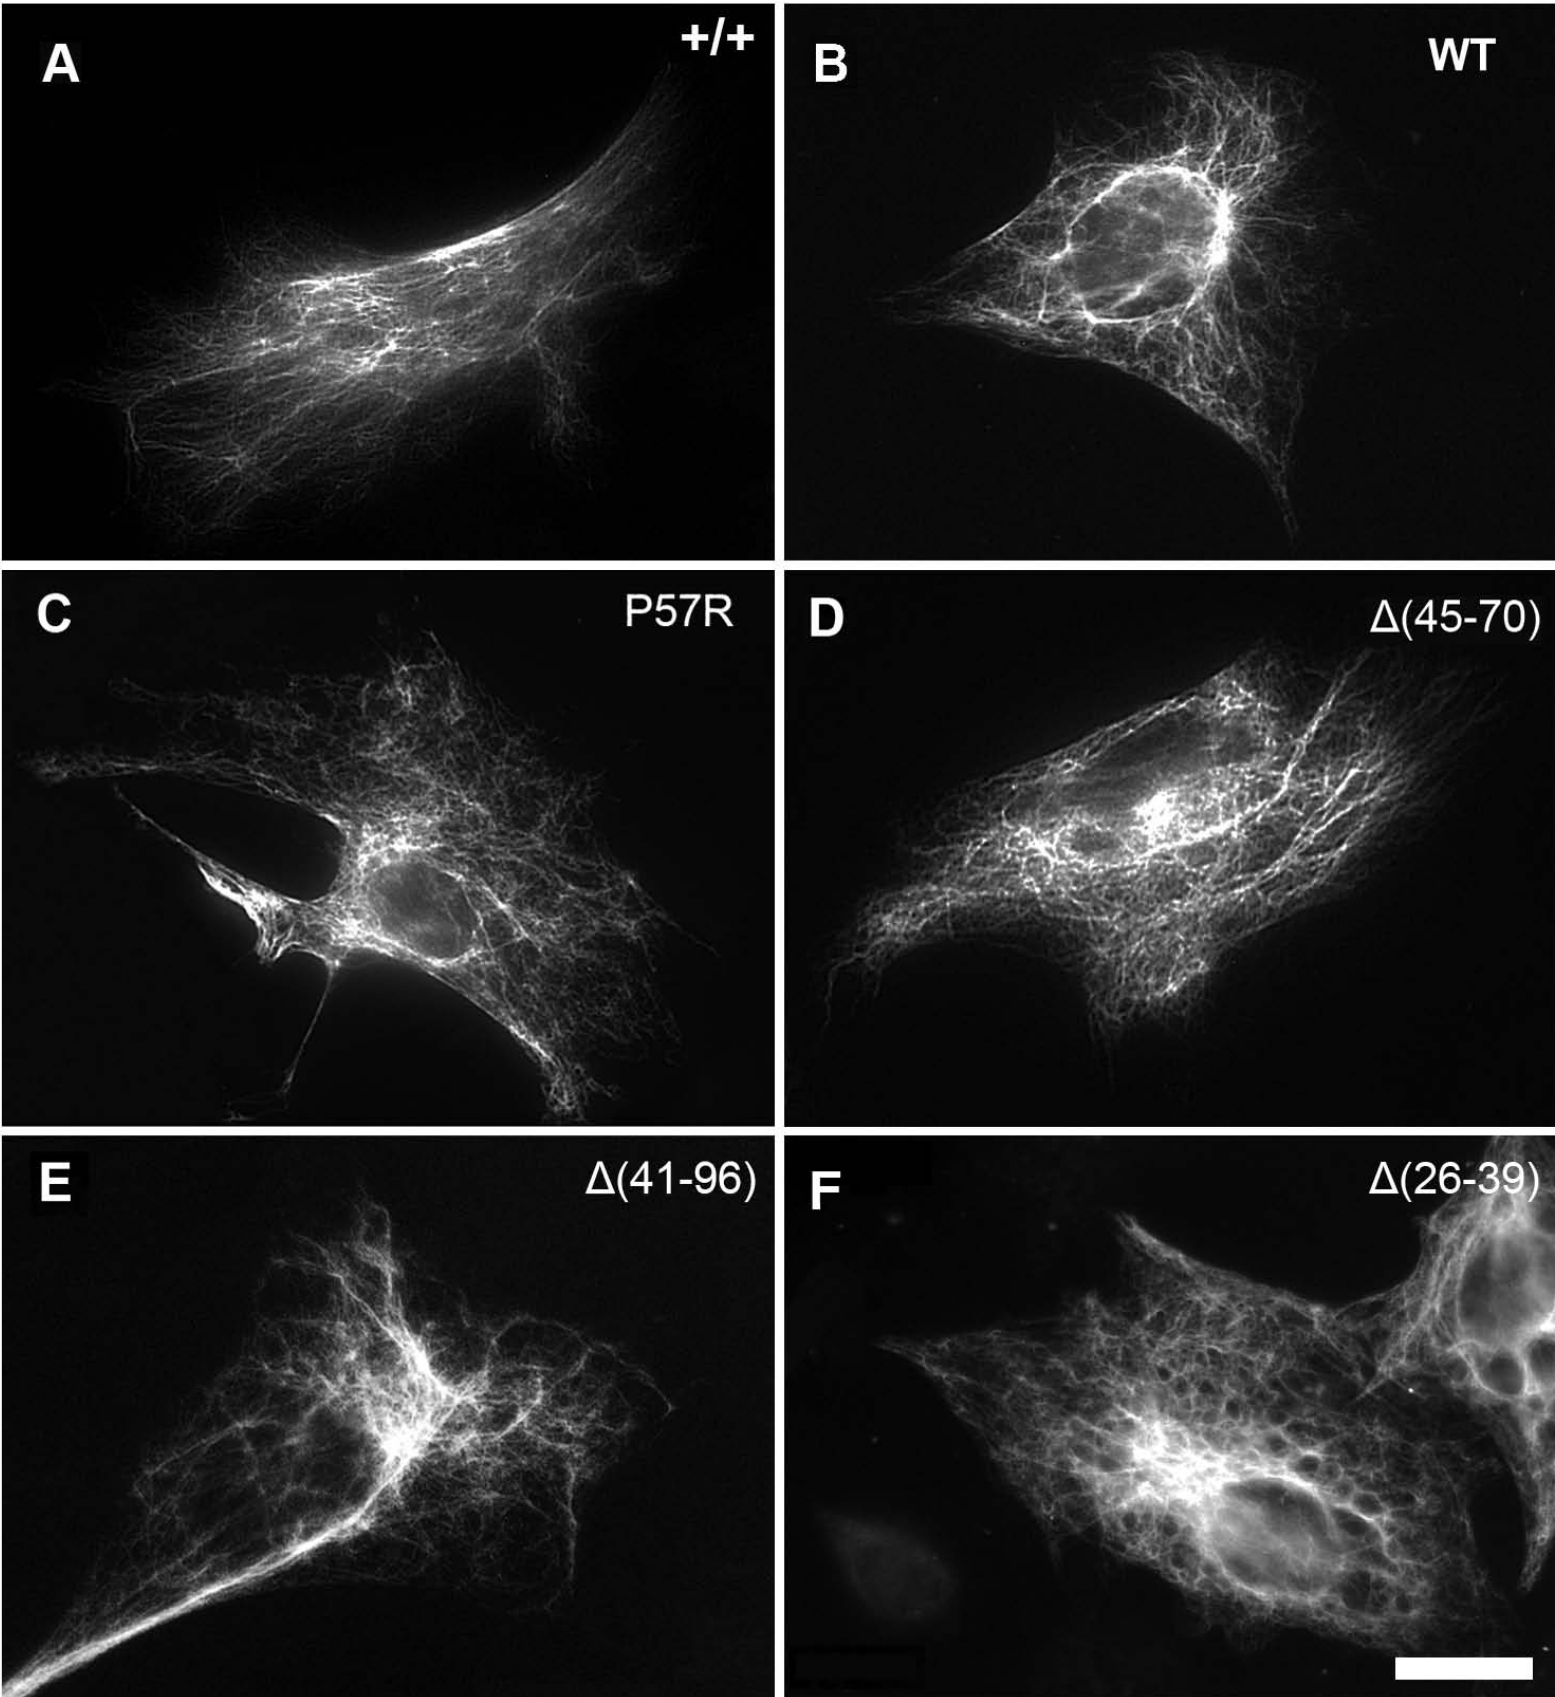

Figure S2

plectin

vimentin

overlay

WT

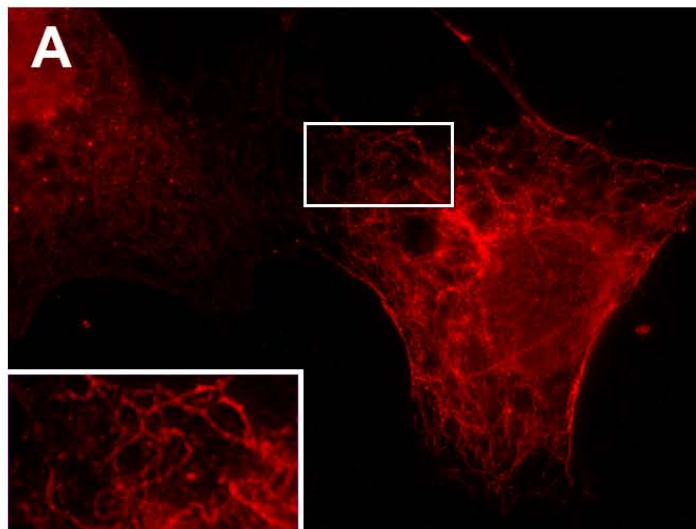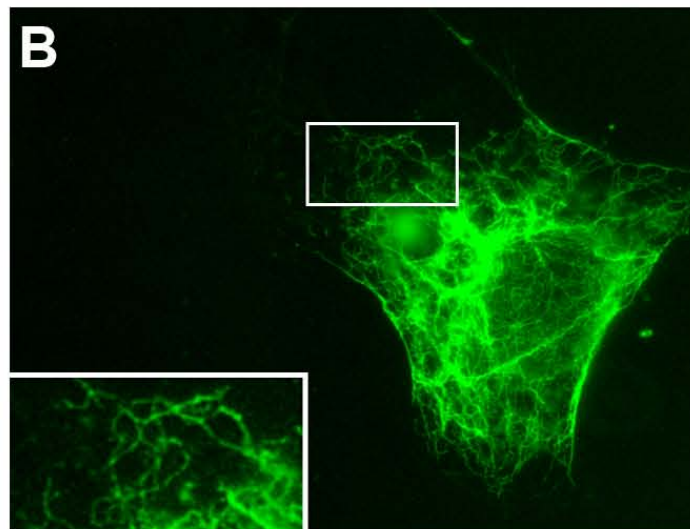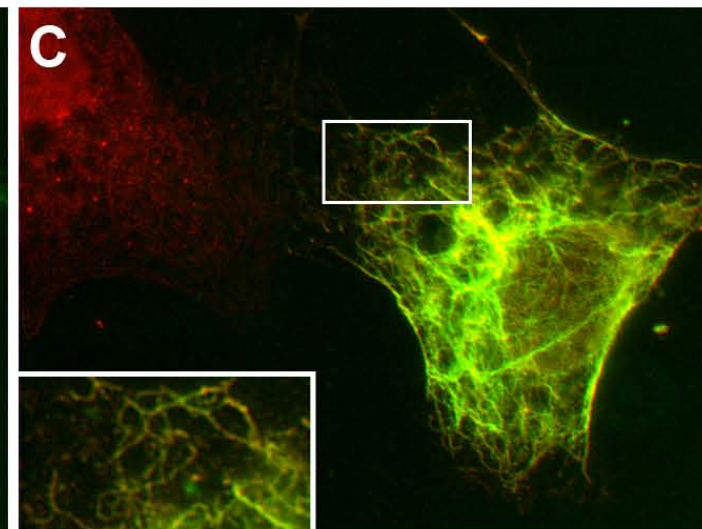

P57R

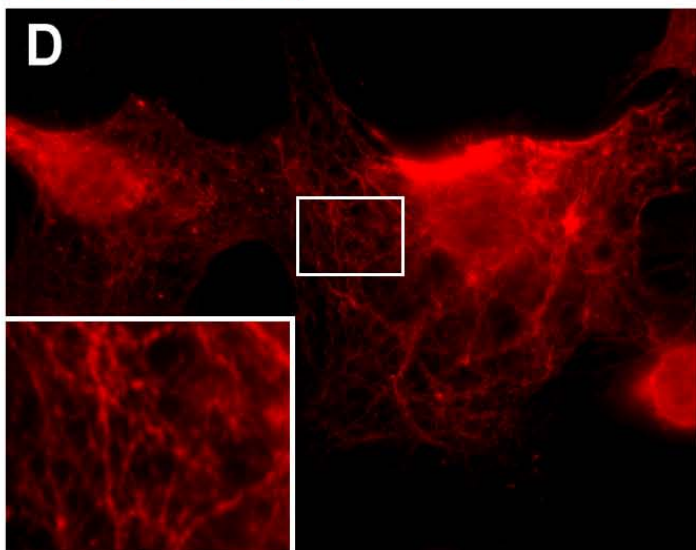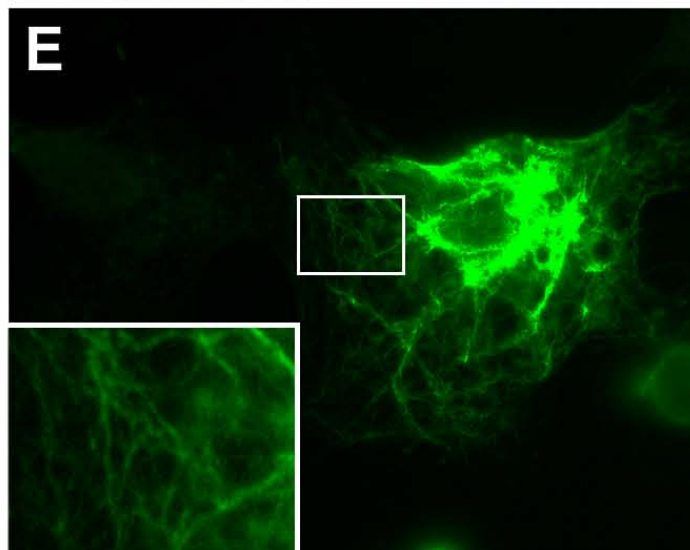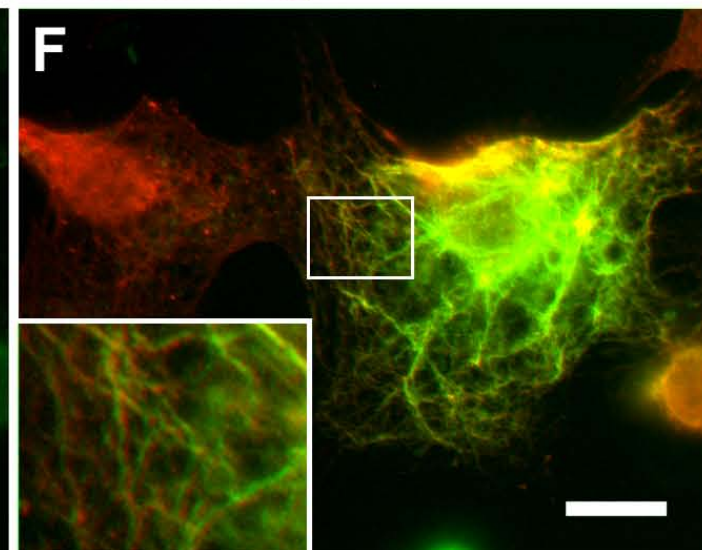



Figure 2S

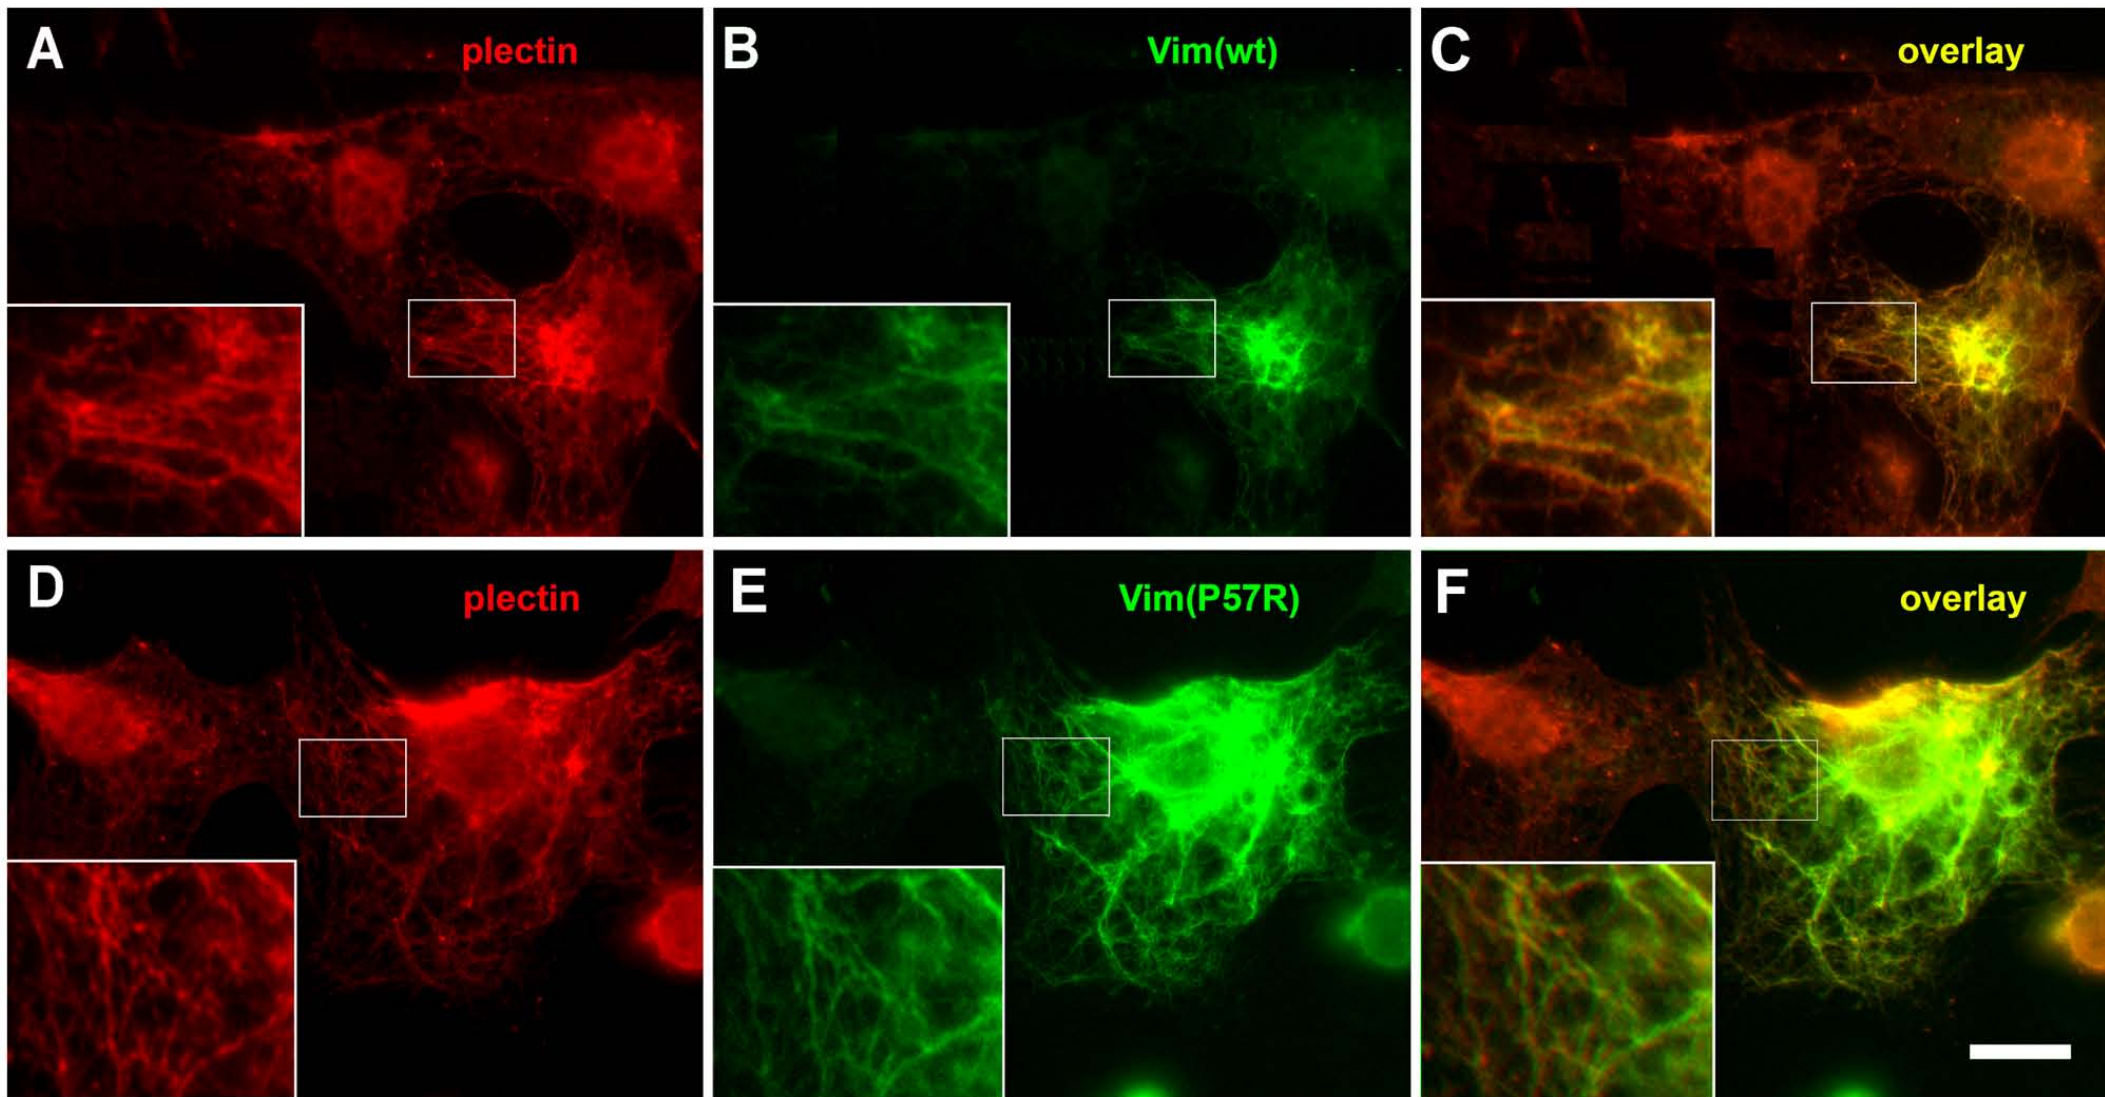

Supplement: E10-09-0766_1.pdf [file E10-09-0766_1.pdf]
